# Supplementary material
Source: MDPI journal article supplement (https://www.mdpi.com/2304-6740/10/2/24)
Supplement: s1 [file s1]

Supplementary information to the paper “Structural insights into a fusion protein between a glutaredoxin-like and a ferredoxin-disulfide reductase domain from an extremophile bacterium” by Zannini et al

| Primer names    | Sequences (5' to 3')                              | Cloned domain          |
|-----------------|---------------------------------------------------|------------------------|
| DpGRX-FDR1 for  | CCCCCCCC <u>CATATG</u> ACTGATAAAAAGATA            | Full-length            |
| DpGRX-FDR1 rev  | CCCCCCCC <u>GGATCCT</u> TAGTCTAACTCATAGTG         | Full-length            |
| DpGRX-FDR1 for2 | CCCCCCCC <u>CATATG</u> CGTACTGAGGTAGATGAA         | FDR domain (AA 83-196) |
| DpGRX-FDR1 rev2 | CCCCCCCC <u>GGATCCT</u> TACCCTATTTTTCTTTTATTTCCTG | GRX domain (AA 1-83)   |

**Table S1: Primers used in this study for PCR cloning.**

Restriction sites are underlined.

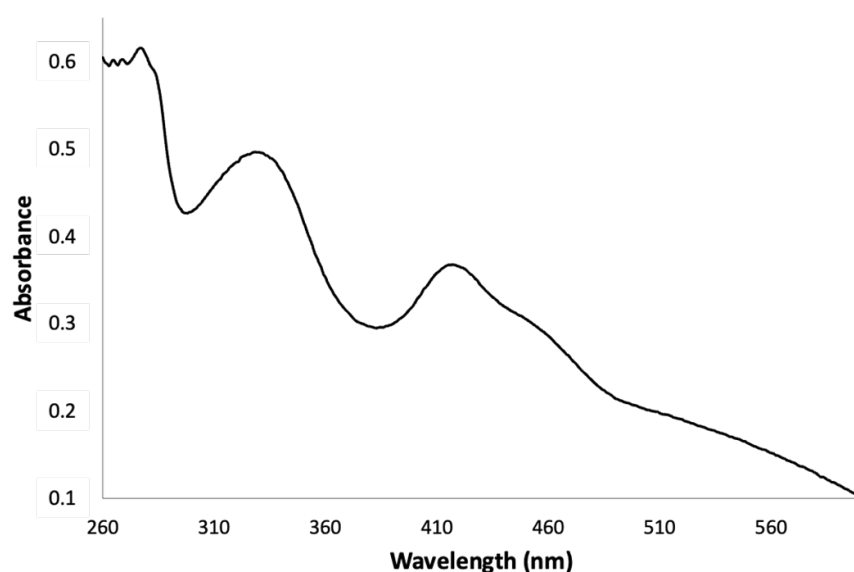

**Figure S1: UV-Visible absorption spectrum of the anaerobically-purified GRX domain of DpGRX-FDR.**

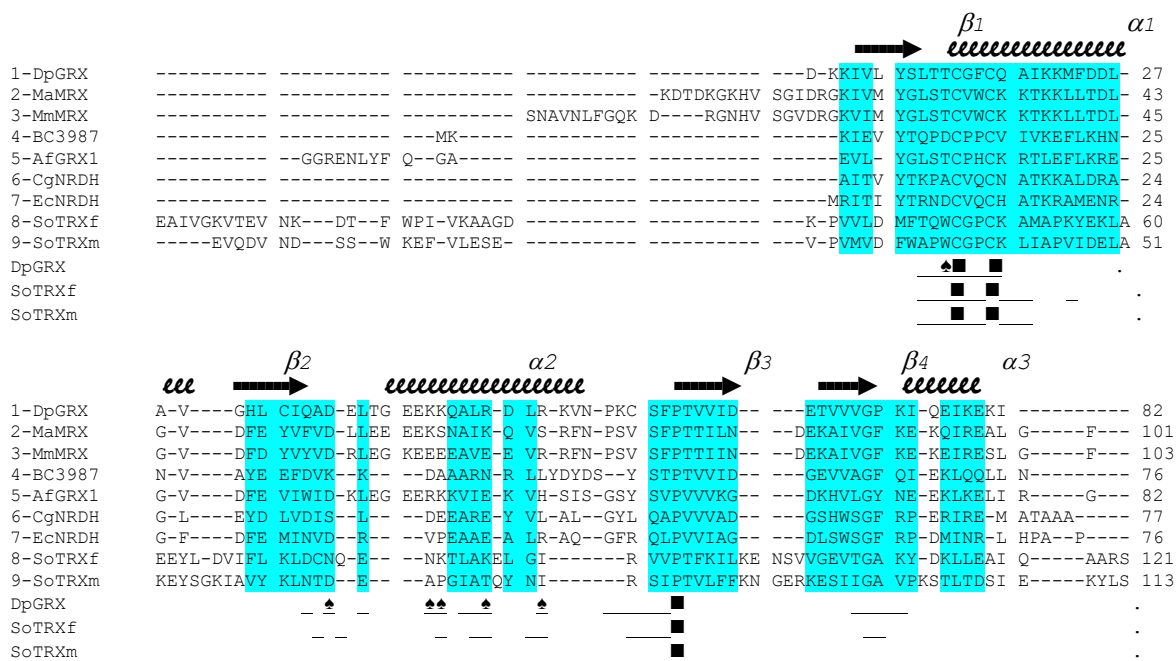

**Figure S2: Structure-based sequence alignment of the GRX-like domain of DpGRX-FDR1 with its structural homologs and spinach TRX-f and TRX-m.**

The sequence alignment was generated with mTM-align. Sequences included in the alignment were retrieved from the RCSB PDB: DpGRX, N-terminal domain of DpGRX-FDR1 (this study); MaMRX, methanoredoxin from *Methanosarcina acetivorans* (PDB ID 5cax), methanoredoxin from *Methanosarcina mazei* (PDB ID 3nzn); BC3987 thioredoxin-like from *Bacillus cereus* (PDB ID 3zij); AfGRX1 glutaredoxin 1 from *Archaeoglobus fulgidus* (PDB ID 3ic4); CgNRDH Nrdh-redoxin from *Corynebacterium glutamicum* (PDB ID 4fiw); NrdH-redoxin from *Escherichia coli* (PDB ID 1h75); SoTRXf TRX f from spinach (PDB ID 2pu9); SoTRXm TRX m from spinach (PDB ID 2puk). Secondary structures are labelled and shown using arrows ( $\beta$ -strands) and squiggles ( $\alpha$  helices). Common regions *i.e.* regions with no gaps and with pairwise residue distances less than 4Å are highlighted blue. Invariant residues are marked with ■. Residues that are hydrogen bonded to DpFDR domain in GRX/FDR complex are marked with ▲. The underlined positions correspond to residues at the interface with the target enzyme (FTR in the case of TRX f and m and DpFDR in the case of DpGRX).

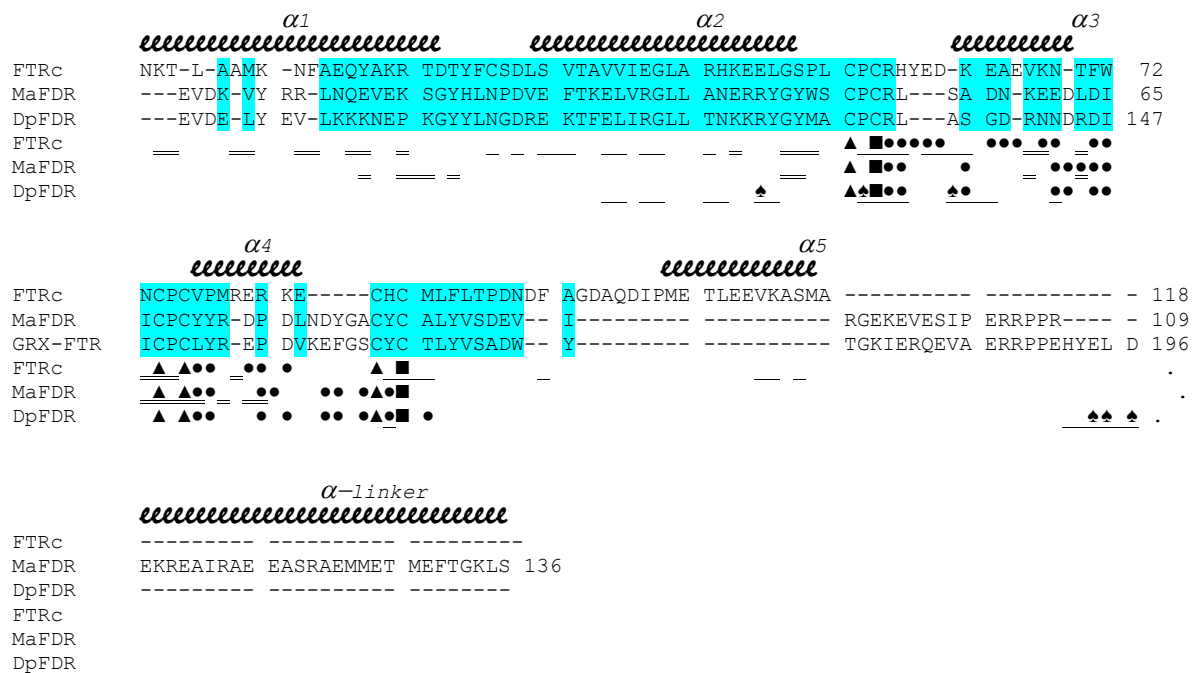

**Figure S3: Structure-based sequence alignment of SynFTRc and FDR domains of MaFDR-RBX and DpGRX-FDR1 highlighting their common regions.**

The sequence alignment was generated with mTM-align. Sequences were retrieved from the RCSB PDB : SynFTRc (PDB ID 1dj7), MaFDR (PDB ID 4tpu), DpFDR (this study). Secondary structures are labelled and shown using arrows ( $\beta$ -strands) and squiggles ( $\alpha$  helices). Common regions *i.e.* regions with no gaps and with pairwise residue distances less than 4Å are highlighted blue. Cysteine residues that coordinate the iron-sulfur center in the resting state are marked with ▲. Cysteine residues that form disulfide bridge in the resting state are marked with ■. Residues near the FTRc iron-sulfur center and covered by FTRv subunit are marked with ●. Residues near the FDR iron-sulfur center and covered by FDR C-terminal tail are marked with •. Residues that are hydrogen bonded to DpGRX domain in DpFDR/DpGRX complex are marked with ◆. The underlined positions correspond to residues at the interface with the target enzyme (TRX in the case of FTR and GRX domain in the case of DpGRX-FDR1). The double underlined positions correspond to residues at the interface with the electron donor (FDX in the case of FTR and the rubredoxin-like domain in the case of MaFDR-RBX).
